# Supplementary material for: The Long Goodbye: Finally Moving on from the Relative Potency Approach to a Mixtures Approach for Polycyclic Aromatic Hydrocarbons (PAHs)
Source: MDPI journal article supplement (doi:10.3390/ijerph19159490), 2022-08-02

**Table S1. Parameters of Reviewed Studies Meeting a priori Criteria (all were dermal studies in female mice)**

**INITIATION/PROMOTION STUDIES**

| Author                                               | Age (weeks) and Strain of mice | Dosing Period & Frequency       |                                                                     | Total Exposure Period (weeks) | Solvent | Purity (PAH/BaP) (%)   | Types of Tumor                      |
|------------------------------------------------------|--------------------------------|---------------------------------|---------------------------------------------------------------------|-------------------------------|---------|------------------------|-------------------------------------|
|                                                      |                                | Initiation (days)               | Promotion (weeks)                                                   |                               |         |                        |                                     |
| Cavalieri et al. 1981 [41]                           | 9 week old Swiss               | 20 days, Subdoses every 2 days  | 40 weeks, TPA 2x/week                                               | 57                            | acetone | 99.7/NR                | Papilloma                           |
| Cavalieri et al. 1991 [39] (1 <sup>st</sup> exper't) | 8-week old SENCAR              | Single dose                     | 12 weeks, 1 week TPA, 2 week pause until TPA resumption TPA 2x/week | 16                            | acetone | 99.7/NR                | Papilloma                           |
| Cavalieri et al. 1991 [39] (2 <sup>nd</sup> exper't) | 8-week old SENCAR              | Single dose                     | 24 weeks , 3 week pause until TPA resumption TPA 2x/week            | 25                            |         |                        |                                     |
| Cavalieri et al. 1991 [39] (3 <sup>rd</sup> exper't) | 8-week old SENCAR              | Single dose                     | No promotion                                                        | 27                            |         |                        |                                     |
| El-Bayoumy et al. 1982 [82]                          | 4 – 5 week old CrI-CD-1        | 20 days Subdoses every two days | 25 weeks, TPA 3x/week                                               | 45                            | acetone | >99/>99                | Primarily squamous cell papilloma   |
| Hecht et al. 1974 [33]                               | (age not specified) CrI-CD-1   | 20 days Subdoses every two days | 20 weeks, after 10 days post-initiation TPA 3x/week                 | 40                            | acetone | >99.9/NR               | Papillomas, carcinomas              |
| Higginbotham et al. 1993 [30]                        | 8 week old SENCAR              | Single dose                     | 27 weeks, TPA 2x/week                                               | 28                            | acetone | >99/>99                | Papilloma, squamous cell carcinomas |
| Hoffman and Wynder 1966 [35]                         | 7-8 week old Ha/ICR/Mil Swiss  | Single dose                     | Croton oil 6 months                                                 | 24                            | dioxane | NR/93                  | Papilloma, epithelioma              |
| LaVoie et al. 1982                                   | 4 – 5 week old CrI:CD-1        | 20 days Subdoses every two days | 20 weeks, TPA 2x/week                                               | 23                            | acetone | Purchased <sup>1</sup> | Not specified                       |

| Author                   | Age (weeks) and Strain of mice             | Dosing Period & Frequency           |                                                      | Total Exposure Period (weeks) | Solvent | Purity (PAH/BaP) (%)   | Types of Tumor                                                         |
|--------------------------|--------------------------------------------|-------------------------------------|------------------------------------------------------|-------------------------------|---------|------------------------|------------------------------------------------------------------------|
|                          |                                            | Initiation (days)                   | Promotion (weeks)                                    |                               |         |                        |                                                                        |
| LaVoie et al. 1993 [83]  | 4 – 5 week old CD-1                        | 20 days Subdoses every two days     | 20 weeks, TPA 3x/week                                | 23                            | acetone | >99/>99                | Primarily squamous cell papilloma                                      |
| Raveh et al. 1982 [42]   | 7-9 week old SENCAR (skin tumor sensitive) | Single dose                         | 25 weeks, TPA 2x/week                                | 25                            | NR      | NR/NR                  | Papilloma                                                              |
| Rice et al. 1985 [84]    | age not specified CD-1 mice                | 20 days Subdoses every two days     | 20 weeks, TPA 3x/week                                | 23                            | acetone | >99/>99                | Not specified                                                          |
| Rice et al. 1988 [85]    | age not specified CD-1 mice                | 20 days Subdoses every two days     | 20 weeks, TPA 3x/week                                | 23                            | acetone | >99/>99                | Not specified                                                          |
| Siddens et al. 2012 [37] | 7.5 weeks-old FVB/N inbred                 | Single dose                         | 20 weeks after 2 weeks post-initiation, TPA 2x week  | 22                            | toluene | Purchased <sup>1</sup> | Papillomas, squamous cell carcinoma and carcinoma in situ              |
| Siddens et al. 2015 [38] | 7.5 weeks-old <i>Cyp 1b1</i> null          | Single dose                         | 20 weeks after 2 weeks post-initiation, TPA 2x week  | 22                            | toluene | Purchased <sup>1</sup> | Papilloma, squamous cell carcinoma                                     |
| Slaga et al. 1978 [86]   | 7-9 week-old CD-1                          | Single dose                         | 26 weeks, TPA 2 times/week                           | 27                            | acetone | >99/>99                | Papilloma                                                              |
| Slaga et al. 1980 [31]   | 7-9 week-old SENCAR                        | Single dose                         | 15 weeks, TPA 2x/week                                | 16                            | acetone | >99/>99                | Papilloma                                                              |
| Tilton et al. 2015 [40]  | 7.5 week-old FVB/N inbred                  | Single dose                         | 25 weeks, after 2 weeks post-initiation; TPA 2x week | 27                            | toluene | Purchased <sup>1</sup> | Papillomas, squamous cell carcinoma and carcinoma in situ <sup>2</sup> |
| Weyand et al. 1992 [87]  | 7 – 8 week old CrI:CD-1                    | 10 or 20 days, dose every other day | 20 weeks, after 10 days post-initiation; TPA 3x week | 21.4                          | acetone | >99/>99                | Not specified                                                          |
| Wood et al. 1980 [32]    | 8-week old CD-1                            | Single dose                         | 26 weeks, TPA 2x week                                | 26                            | acetone | NR/>98%                | Papilloma                                                              |

<sup>1</sup> Not reported, but all stated they were purchased from commercial laboratories, so the assumption is that the purity is high.

<sup>2</sup> This was the only study that measured tumor incidence as the percent incidence for each tumor type.

NR = Not reported

#### COMPLETE CARCINOGENICITY STUDIES

| Author                        | Age (weeks) and Strain of mice | Target PAH Exposure   | Protocol for Mice Dying during Experiment | Total Exposure Period                                                                              | Solvent | Purity (PAH/BaP) (%) | Types of Tumor                                                                              |
|-------------------------------|--------------------------------|-----------------------|-------------------------------------------|----------------------------------------------------------------------------------------------------|---------|----------------------|---------------------------------------------------------------------------------------------|
| Barry et al. 1935 [29]        | Unspecified                    | 2x week; 1 – 2+ years | Not specified                             | Until end of life                                                                                  | benzene | varying              | Papilloma, epithelioma                                                                      |
| Cavalieri et al. 1977 [81]    | 7 week-old random bred Swiss   | 30 weeks; 2x/week     | Moribund or dead                          | Sacrificed survivors at 70 weeks                                                                   | acetone | 99/99                | Papilloma, kerato-acanthoma, carcinoma                                                      |
| Cavalieri et al. 1981 [41]    | 9 week-old CD-1                | 30 weeks; 2x/week     | Until 2 cm tumor or moribund              | Sacrificed survivors at 57 weeks                                                                   | acetone | 99.7/NR              | Papilloma                                                                                   |
| Cavalieri et al. 1983 [43]    | 9 week old Swiss               | 48 weeks; 2x/week     | Until tumor size > 2 cm                   | Sacrificed survivors at 61 weeks                                                                   | acetone | 99.7/NR              | Sum of papilloma, sebaceous gland adenomas, squamous cell carcinomas, basal cell carcinomas |
| Habs et al. 1980 [36]         | 10-week old NMRI               | Life; 2x/week         | Obvious tumor growth                      | Until end of life                                                                                  | acetone | >96/>96              | Sum of Papilloma, carcinoma, sarcoma                                                        |
| Hecht et al. 1974 [33]        | albino Ha/ICR/Mil Swiss        | 17 months, 3x/week    | Not specified                             | Sacrificed survivors at 72 weeks. 5-MeCH 100% mortality at 35 weeks; BaP 65% mortality at week 70. | acetone | >99.9/NR             | Papillomas, carcinomas                                                                      |
| Higgenbotham et al. 1993 [30] | 8 week-old Swiss               | 40 weeks; 2x/week     | Until tumor size > 2 cm                   | 48 weeks                                                                                           | acetone | >99/>99              | Papilloma, squamous cell carcinomas                                                         |
| Hoffman and Wynder 1966       | 7-8 week-old Ha/ICR/Mil Swiss  | 12 months; 3x/week    | Not specified                             | 15 months                                                                                          | dioxane | NR/93                | Papilloma, epithelioma                                                                      |

Table S2. Summary of Study Design and Dose-Response Information for Studies that met Dose Response Criteria in Table 6.

| Study                      | Chemical              | Dose Units | Dose of PAH | Dose Mass (µg/mouse) <sup>1</sup> | Number of animals with tumours | Number animals/group | % tumour bearing animals | Tumour Type        |
|----------------------------|-----------------------|------------|-------------|-----------------------------------|--------------------------------|----------------------|--------------------------|--------------------|
| Cavalieri et al. 1981 [41] | Solvent - acetone     | 33.4 µl    | 0           | 0                                 | 3                              | 29                   | 10                       | Mostly Papillomas. |
|                            | Benzo[a]pyrene        | µmol       | 0.2         | 50.5                              | 12                             | 30                   | 40                       |                    |
|                            | Cyclopenta[c,d]pyrene |            | 0.2         | 45.3                              | 3                              | 30                   | 1                        |                    |
|                            |                       |            | 0.6         | 135.8                             | 9                              | 30                   | 31                       |                    |
|                            |                       |            | 1.8         | 407.3                             | 6                              | 30                   | 21                       |                    |

**Study Type:** Initiation/Promotion

**Study Details**

**Exposure Duration:** 9-week old female Swiss albino mice in groups of 30 were exposed dermally every other day for 20 days for a total of 10 subdoses in 33.4 µL of acetone. Promotion started after last treatment using TPA (12-O-tetradecanoylphorbol-13-acetate) twice weekly at a dose of 0.017 µmol in 33 µL of acetone for 40 weeks. Mice were killed when skin tumors were 2 cm in diameter or larger, and/or mice were moribund. Survivors were sacrificed after 57 experimental weeks.

**Mortality:** No information was provided on time to tumors and dose dependency. No information was provided on mortality of mice before end of experiment.

**Purity:** Not reported.

**Note:** 10% tumor incidence for acetone control is problematic

| Study                      | Chemical          | Dose Units | Dose of PAH | Dose Mass (µg/mouse) <sup>1</sup> | Number of animals with tumours | Number animals/group | % tumour bearing animals | Tumour type     |
|----------------------------|-------------------|------------|-------------|-----------------------------------|--------------------------------|----------------------|--------------------------|-----------------|
| Cavalieri et al. 1983 [43] | Solvent - acetone | 50 µL      | 0           | 0                                 | 0                              | 29                   | 0                        | Papilloma,      |
|                            | Benzo[a]pyrene    | nmol       | 2.2         | 0.6                               | 2                              | 30                   | 7                        | sebaceous gland |
|                            |                   |            | 6.6         | 1.7                               | 2                              | 28                   | 7                        | adenomas,       |

| Study | Chemical              | Dose Units | Dose of PAH | Dose Mass (µg/mouse) <sup>1</sup> | Number of animals with tumours | Number animals/group | % tumour bearing animals | Tumour Type |
|-------|-----------------------|------------|-------------|-----------------------------------|--------------------------------|----------------------|--------------------------|-------------|
|       |                       |            |             | 20                                | 5.1                            | 17                   | 30                       | 57          |
|       | Cyclopenta[c,d]pyrene |            |             | 22.2                              | 5.0                            | 2                    | 29                       | 7           |
|       |                       |            | nmol        | 66.6                              | 15.1                           | 2                    | 29                       | 7           |
|       |                       |            |             | 200                               | 45.3                           | 24                   | 29                       | 83          |

**Study Type:** Complete Carcinogenicity

**Study Details**

**Exposure Duration:** 9-week old female Swiss mice were exposed dermally to CP twice weekly in acetone for 48 weeks. It is assumed sub-doses were applied in twice weekly application. Mice were killed when skin tumors were at least 2 cm in diameter and survivors sacrificed after 61 experimental weeks.

**Note:** Only tumor incidence data provided so number of animals with skin tumor incidence calculated from % tumor-bearing animals.

**Mortality:** No information was provided on time to tumors and dose dependency. No information on whether survival was statistically affected at any dose.

**Purity:** Available for CPP in another paper, but not reported for BaP.

| Study                        | Chemical             | Dose Units | Dose of PAH | Dose Mass (µg/mouse) <sup>1</sup> | Number of animals with tumours | Number animals/group | % tumour bearing animals | Tumour type                                                                                                                 |
|------------------------------|----------------------|------------|-------------|-----------------------------------|--------------------------------|----------------------|--------------------------|-----------------------------------------------------------------------------------------------------------------------------|
| <b>Habs et al. 1980 [36]</b> | Control - Acetone    | 20 µL      | 0           | 0                                 | 0                              | 35                   | 0                        |                                                                                                                             |
|                              | Benzo[a]pyrene       | µg/mouse   |             | 1.7                               | 8                              | 34                   | 24                       | Type of tumors was not provided, but based on text, papillomas, sarcomas and carcinomas were mentioned for a few chemicals. |
|                              |                      |            |             | 2.8                               | 24                             | 35                   | 69                       |                                                                                                                             |
|                              |                      |            |             | 4.6                               | 22                             | 36                   | 61                       |                                                                                                                             |
|                              | Benzo[b]fluoranthene | µg/mouse   |             | 3.4                               | 2                              | 38                   | 5                        |                                                                                                                             |
|                              |                      |            |             | 5.6                               | 5                              | 34                   | 15                       |                                                                                                                             |
|                              |                      |            |             | 9.2                               | 20                             | 37                   | 54                       |                                                                                                                             |
|                              | Benzo[j]fluoranthene | µg/        |             | 3.4                               | 1                              | 38                   | 3                        |                                                                                                                             |

| Study | Chemical              | Dose Units | Dose of PAH | Dose Mass (µg/mouse) <sup>1</sup> | Number of animals with tumours | Number animals/group | % tumour bearing animals | Tumour Type |
|-------|-----------------------|------------|-------------|-----------------------------------|--------------------------------|----------------------|--------------------------|-------------|
|       |                       | mouse      |             | 5.6                               | 1                              | 35                   | 3                        |             |
|       |                       |            |             | 9.2                               | 2                              | 38                   | 5                        |             |
|       | Benzo[k]fluoranthene  | µg/mouse   |             | 3.4                               | 1                              | 39                   | 3                        |             |
|       |                       |            |             | 5.6                               | 0                              | 38                   | 0                        |             |
|       |                       |            |             | 9.2                               | 0                              | 38                   | 0                        |             |
|       | Cyclopenta[c,d]pyrene | µg/mouse   |             | 1.7                               | 0                              | 34                   | 0                        |             |
|       |                       |            |             | 6.8                               | 0                              | 35                   | 0                        |             |
|       |                       |            |             | 27.2                              | 3                              | 38                   | 8                        |             |

**Study Type:** Complete Carcinogenicity

**Study Details**

**Exposure Duration:** 10-week old NMRI Mice exposed 2x/week for life, until moribund or dead. The amount of acetone was not specified for controls. We assumed that each application were in subdoses of 0.02 ml acetone. Animals were housed 10 mice per cage. Animals at an advanced stage of macroscopically clearly infiltrative tumor growth were killed prior to their natural death, all the other animals were observed until their natural death. Authors also reported age-standardized tumour frequency; but did not specify how this was calculated.

**Mortality:** No information was provided on time to tumors and dose dependency, nor on whether survival was statistically affected at any dose.

**Purity:** All PAHs >96%

| Study                  | Chemical                             | Dose Units      | Dose of PAH | Dose Mass (µg/mouse) <sup>1</sup> | Number of animals with tumours | Number animals/group | % tumour bearing animals | Tumour Type |
|------------------------|--------------------------------------|-----------------|-------------|-----------------------------------|--------------------------------|----------------------|--------------------------|-------------|
| Raveh et al. 1982 [42] | Control – chemical name not provided | NR <sup>2</sup> |             | NR                                | 3                              | 29                   | 10                       |             |
|                        | Benzo[a]pyrene                       | µg/mouse        |             | 10                                | 17                             | 29                   | 59                       | Papillomas  |

| Study | Chemical             | Dose Units | Dose of PAH | Dose Mass (µg/mouse) <sup>1</sup> | Number of animals with tumours | Number animals/group | % tumour bearing animals | Tumour Type |
|-------|----------------------|------------|-------------|-----------------------------------|--------------------------------|----------------------|--------------------------|-------------|
|       |                      |            |             | 25                                | 21                             | 28                   | 75                       |             |
|       |                      |            |             | 50                                | 24                             | 28                   | 86                       |             |
|       |                      |            |             | 100                               | 27                             | 27                   | 100                      |             |
|       |                      |            |             | 200                               | 26                             | 26                   | 100                      |             |
|       | Cyclopenta(cd)pyrene | µg/mouse   |             | 10                                | 3                              | 30                   | 10                       |             |
|       |                      |            |             | 100                               | 11                             | 29                   | 38                       |             |
|       |                      |            |             | 200                               | 16                             | 28                   | 57                       |             |

**Study Type:** Initiation/Promotion

#### Study Details

**Exposure Duration:** 7-9-week old female SENCAR (skin tumor sensitive) mice in groups of 30 were exposed dermally in a single dose.

Promotion began a week later with 2 µg TPA applied twice weekly for 25 weeks. Tumor incidence calculated from % tumor bearing animals but conversion to number of animals did not result in whole animal numbers for several groups. Adjustment of ± 1% resulted in appropriate numbers of animals. It was not clear why the estimated incidence does not correctly back-calculate to % tumor bearing animals. And the only possibility is incorrect rounding errors. Use of solvent for control animals not indicated.

**Mortality:** The number of papillomas per mouse at 25 weeks after initiation was dose dependent up to 200 µg/ml in the case of CPP and up to 100 µg/ml in the case of BaP. Not clear whether survival was statistically affected at any dose.

**Purity:** Not reported.

<sup>1</sup> Dose converted to µg/mouse from other units if authors did not provide units as µg/mouse

<sup>2</sup> NR = Not reported

#### **Reference**

Cavalieri, E.; Rogan, E.; Toth, B.; Munhall, A. Carcinogenicity of the environmental pollutants cyclopenteno-(cd) pyrene and cyclopentano(cd)pyrene in mouse skin. *Carcinogenesis* **1981**, 2 (4), pp. 277-281.

Cavalieri, E.; Munhall, A.; Rogan, E.; Salmasi, S.; Patil, K. Syncarcinogenic effect of the environmental pollutants cyclopenteno[cd]pyrene and benzo[a]pyrene in mouse skin. *Carcinogenesis* **1983**, 4 (4), pp. 393-397.

Habs, M.; Schmähl, D.; Misfeld, J. Local carcinogenicity of some environmentally relevant polycyclic aromatic hydrocarbons after lifelong topical application to mouse skin. *Arch Geschwulstforsch* **1980**, 50 (3), pp. 266-74.

Raveh, D.; Slaga, T. J.; Huberman, E. Cell-mediated mutagenesis and tumor-initiating activity of the ubiquitous polycyclic hydrocarbon, cyclopenta[c,d]pyrene. *Carcinogenesis* **1982**, 3 (7), pp. 763-766.

**Table S3. Summary of BMD Modeling Results.***Habs et al., 1980. BaP (Including high dose)*

| Model Name       | Posterior Probability | BMD  | BMDL | BMDU | P-value | AIC    | Scaled residual for dose group nearest the BMD | Scaled residual for control group |
|------------------|-----------------------|------|------|------|---------|--------|------------------------------------------------|-----------------------------------|
| Dichotomous Hill | 0.14                  | 1.57 | 1.11 | 1.67 | 0.50    | 135.23 | 0.00                                           | 0.00                              |
| Gamma            | 0.06                  | 0.48 | 0.02 | 1.05 | 0.01    | 142.34 | 0.00                                           | 0.00                              |
| Logistic         | 0.00                  | 1.10 | 0.88 | 1.37 | 0.00    | 151.35 | -0.24                                          | -1.81                             |
| LogLogistic      | 0.14                  | 0.67 | 0.13 | 1.15 | 0.01    | 141.59 | 0.00                                           | 0.00                              |
| LogProbit        | 0.05                  | 0.73 | 0.15 | 1.21 | 0.01    | 141.61 | 0.00                                           | 0.00                              |
| Multistage-3     | 0.13                  | 1.48 | 1.10 | 1.64 | NA      | 136.79 | 0.00                                           | 0.00                              |
| Multistage-2     | 0.13                  | 0.37 | 0.22 | 0.77 | 0.01    | 142.24 | 0.00                                           | 0.00                              |
| Multistage-1     | 0.13                  | 0.42 | 0.34 | 0.54 | 0.03    | 140.37 | 0.00                                           | 0.00                              |
| Probit           | 0.00                  | 1.06 | 0.85 | 1.33 | 0.00    | 150.29 | -0.17                                          | -1.63                             |
| Quantal-Linear   | 0.43                  | 0.42 | 0.34 | 0.54 | 0.06    | 138.37 | 0.00                                           | 0.00                              |
| Weibull          | 0.05                  | 0.44 | 0.04 | 0.93 | 0.01    | 142.36 | 0.00                                           | 0.00                              |
| BMA              | N/A                   | 0.58 | 0.33 | 1.12 | -       | -      | -                                              | -                                 |

Inadequate fit – and dichotomous Hill model is overparameterized, so this is just presented for context, no figure.

Habs et al., 1980. BaP (High dose dropped)

| Model Name       | Posterior Probability | BMD         | BMDL | BMDU | P-value | AIC   | Scaled residual for dose group nearest the BMD | Scaled residual for control group |
|------------------|-----------------------|-------------|------|------|---------|-------|------------------------------------------------|-----------------------------------|
| Dichotomous Hill | 0.05                  | 1.31        | 0.84 | 1.61 | NA      | 88.67 | 0.00                                           | 0.00                              |
| Gamma            | 0.02                  | 1.31        | 0.78 | 1.61 | 1.00    | 84.67 | 0.00                                           | 0.00                              |
| Logistic         | 0.08                  | 1.30        | 0.96 | 1.62 | 0.49    | 85.48 | 0.35                                           | -0.57                             |
| LogLogistic      | 0.11                  | 1.31        | 0.84 | 1.61 | NA      | 86.67 | 0.00                                           | 0.00                              |
| LogProbit        | 0.12                  | 1.35        | 0.90 | 1.62 | NA      | 86.67 | 0.00                                           | 0.00                              |
| Multistage-3     | -                     | -           | -    | -    | -       | -     | -                                              | -                                 |
| Multistage-2     | 0.02                  | 1.36        | 0.65 | 1.64 | NA      | 86.67 | 0.00                                           | 0.00                              |
| Multistage-1     | 0.02                  | 0.36        | 0.27 | 0.50 | 0.02    | 90.77 | 0.00                                           | 0.00                              |
| Probit           | 0.43                  | 1.27        | 0.91 | 1.60 | 0.69    | 84.94 | 0.20                                           | -0.33                             |
| Quantal-Linear   | 0.02                  | 0.36        | 0.27 | 0.50 | 0.06    | 88.77 | 0.00                                           | 0.00                              |
| Weibull          | 0.14                  | 1.24        | 0.72 | 1.59 | NA      | 86.67 | 0.00                                           | 0.00                              |
| <b>BMA</b>       | -                     | <b>1.10</b> | 0.54 | 1.50 | -       | -     | -                                              | -                                 |

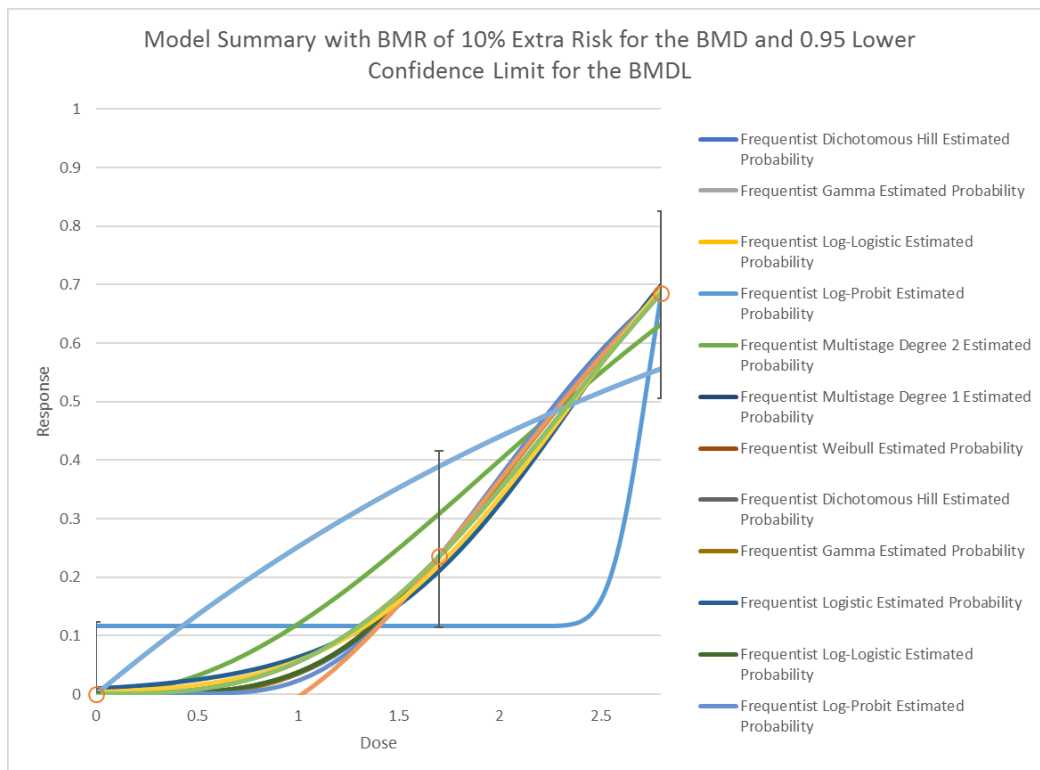

| Model Name       | Posterior Probability | BMD         | BMDL | BMDU | P-value | AIC    | Scaled residual for dose group nearest the BMD | Scaled residual for control group |
|------------------|-----------------------|-------------|------|------|---------|--------|------------------------------------------------|-----------------------------------|
| Dichotomous Hill | 0.06                  | 4.59        | 3.50 | 5.49 | 0.52    | 101.52 | -0.45                                          | 0.00                              |
| Gamma            | 0.02                  | 4.54        | 3.45 | 5.38 | 0.79    | 99.58  | -0.51                                          | 0.00                              |
| Logistic         | 0.08                  | 5.03        | 4.09 | 5.93 | 0.86    | 99.68  | 0.11                                           | -0.50                             |
| LogLogistic      | 0.12                  | 4.59        | 3.50 | 5.49 | 0.52    | 101.52 | -0.45                                          | 0.00                              |
| LogProbit        | 0.13                  | 8.49        | 0.00 | 9.25 | 0.01    | 108.76 | 0.00                                           | -1.57                             |
| Multistage-3     | 0.00                  | 4.80        | 0.93 | 6.13 | NA      | 103.11 | 0.00                                           | 0.00                              |
| Multistage-2     | 0.00                  | 4.37        | 3.30 | 5.17 | 0.74    | 99.75  | 0.28                                           | 0.00                              |
| Multistage-1     | 0.00                  | 2.12        | 1.56 | 2.97 | 0.01    | 109.55 | -1.75                                          | 0.00                              |
| Probit           | 0.47                  | 4.81        | 3.87 | 5.68 | 0.91    | 99.39  | -0.11                                          | -0.31                             |
| Quantal-Linear   | 0.00                  | 2.12        | 1.56 | 2.96 | 0.02    | 107.55 | -1.75                                          | 0.00                              |
| Weibull          | 0.12                  | 4.62        | 3.44 | 5.58 | 0.91    | 99.31  | -0.32                                          | 0.00                              |
| <b>BMA</b>       | -                     | <b>4.59</b> | 3.51 | 5.70 | -       | -      | -                                              | -                                 |

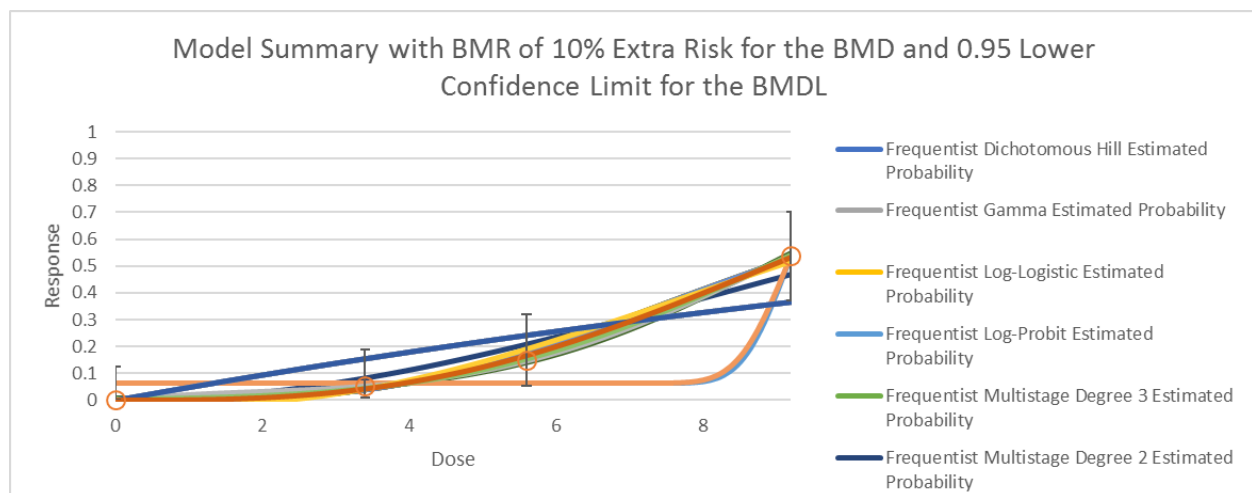

| Model Name       | Posterior Probability | BMD          | BMDL         | BMDU     | P-value | AIC   | Scaled residual for dose group nearest the BMD | Scaled residual for control group |
|------------------|-----------------------|--------------|--------------|----------|---------|-------|------------------------------------------------|-----------------------------------|
| Dichotomous Hill | 0.17                  | 27.96        | 8.23         | 53.42    | 1.00    | 24.99 | 0.00                                           | 0.00                              |
| Gamma            | 0.02                  | 28.16        | 21.24        | Infinity | 1.00    | 24.99 | 0.00                                           | 0.00                              |
| Logistic         | 0.13                  | 27.65        | 24.33        | 41.75    | 1.00    | 22.99 | 0.00                                           | 0.00                              |
| LogLogistic      | 0.00                  | 27.59        | 21.32        | Infinity | 1.00    | 22.99 | 0.00                                           | 0.00                              |
| LogProbit        | 0.02                  | NA           | 0.00         | Infinity | 0.00    | 35.08 | 2.48                                           | -0.87                             |
| Multistage-3     | 0.00                  | 27.26        | 8.14         | 28.00    | NA      | 28.99 | 0.00                                           | 0.00                              |
| Multistage-2     | 0.00                  | 30.26        | 21.42        | Infinity | 1.00    | 24.99 | 0.00                                           | 0.00                              |
| Multistage-1     | 0.00                  | 45.24        | 19.90        | Infinity | 0.64    | 26.56 | 0.45                                           | 0.00                              |
| Probit           | 0.65                  | 27.81        | 23.58        | 44.89    | 1.00    | 24.99 | 0.00                                           | 0.00                              |
| Quantal-Linear   | 0.00                  | 45.24        | 19.91        | Infinity | 0.83    | 24.56 | 0.45                                           | 0.00                              |
| Weibull          | 0.00                  | 27.58        | 21.51        | Infinity | 1.00    | 22.99 | 0.00                                           | 0.00                              |
| <b>BMA</b>       |                       | <b>36.57</b> | <b>23.05</b> | Infinity | -       | -     | -                                              | -                                 |

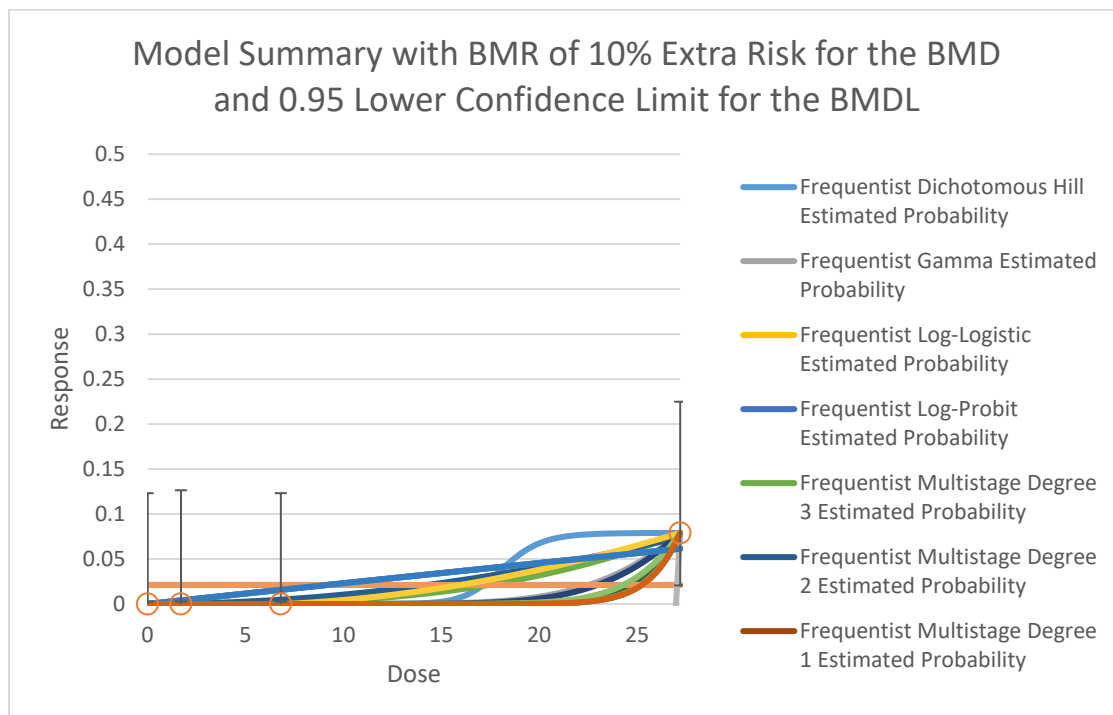

| Model Name       | Posterior Probability | BMD         | BMDL | BMDU | P-value | AIC   | Scaled residual for dose group nearest the BMD | Scaled residual for control group |
|------------------|-----------------------|-------------|------|------|---------|-------|------------------------------------------------|-----------------------------------|
| Dichotomous Hill | 0.08                  | 2.14        | 0.71 | 4.72 | NA      | 80.82 | -0.17                                          | -0.94                             |
| Gamma            | 0.06                  | 1.22        | 0.63 | 1.81 | 0.26    | 76.90 | -1.19                                          | 0.00                              |
| Logistic         | 0.11                  | 2.22        | 1.70 | 2.81 | 0.45    | 76.24 | -0.19                                          | -0.82                             |
| LogLogistic      | 0.16                  | 2.14        | 0.71 | 4.57 | 0.15    | 78.82 | -0.17                                          | -0.94                             |
| LogProbit        | 0.11                  | 2.19        | 0.76 | 4.85 | 0.16    | 78.92 | -0.02                                          | -1.00                             |
| Multistage-3     | 0.02                  | 3.23        | 0.28 | 4.41 | NA      | 78.16 | 0.00                                           | 0.00                              |
| Multistage-2     | 0.02                  | 1.34        | 0.72 | 2.69 | 0.16    | 78.05 | -0.96                                          | 0.00                              |
| Multistage-1     | 0.02                  | 0.83        | 0.59 | 1.22 | 0.16    | 78.43 | -0.03                                          | 0.00                              |
| Probit           | 0.28                  | 2.00        | 1.55 | 2.54 | 0.43    | 76.19 | -0.35                                          | -0.74                             |
| Quantal-Linear   | 0.05                  | 0.83        | 0.59 | 1.22 | 0.16    | 78.43 | -0.03                                          | 0.00                              |
| Weibull          | 0.15                  | 1.95        | 0.66 | 4.58 | 0.14    | 78.72 | -0.42                                          | -0.83                             |
| <b>BMA</b>       | -                     | <b>1.87</b> | 0.91 | 2.84 | -       | -     | -                                              | -                                 |

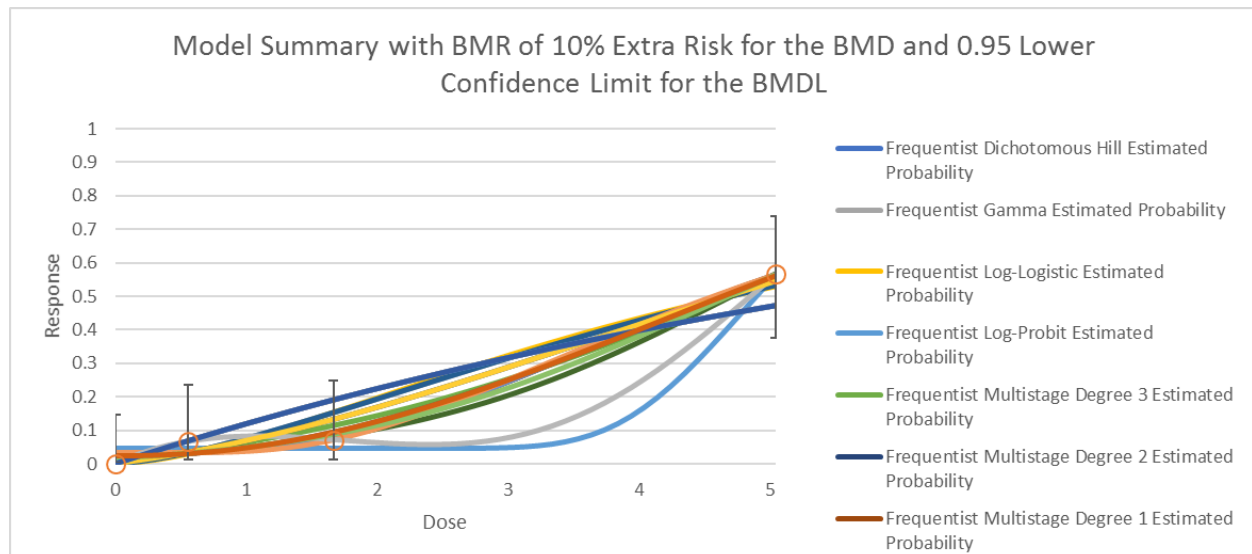

| Model Name       | Posterior Probability | BMD          | BMDL  | BMDU  | P-value | AIC   | Scaled residual for dose group nearest the BMD | Scaled residual for control group |
|------------------|-----------------------|--------------|-------|-------|---------|-------|------------------------------------------------|-----------------------------------|
| Dichotomous Hill | 0.04                  | 19.17        | 12.17 | 38.70 | NA      | 66.60 | -0.03                                          | -1.01                             |
| Gamma            | 0.01                  | 19.13        | 11.68 | 29.16 | 0.15    | 64.61 | -0.01                                          | -1.01                             |
| Logistic         | 0.12                  | 16.56        | 12.41 | 21.39 | 0.32    | 62.14 | -0.51                                          | -0.69                             |
| LogLogistic      | 0.09                  | 19.17        | 12.17 | 44.52 | 0.15    | 64.60 | -0.03                                          | -1.01                             |
| LogProbit        | 0.17                  | 18.60        | 13.10 | 41.01 | 0.15    | 64.62 | 0.00                                           | -1.02                             |
| Multistage-3     | 0.01                  | 22.96        | 2.61  | 33.83 | NA      | 63.77 | 0.00                                           | 0.00                              |
| Multistage-2     | 0.01                  | 10.69        | 6.80  | 21.45 | 0.12    | 64.16 | -1.53                                          | 0.00                              |
| Multistage-1     | 0.01                  | 4.67         | 3.43  | 6.54  | 0.00    | 74.04 | -0.67                                          | 0.00                              |
| Probit           | 0.37                  | 14.89        | 11.27 | 19.06 | 0.25    | 62.42 | -0.75                                          | -0.58                             |
| Quantal-Linear   | 0.00                  | 4.67         | 3.43  | 6.54  | 0.00    | 74.04 | -0.67                                          | 0.00                              |
| Weibull          | 0.19                  | 19.75        | 9.43  | 39.60 | 0.15    | 64.56 | -0.08                                          | -0.99                             |
| <b>BMA</b>       | -                     | <b>15.49</b> | 10.31 | 22.67 | -       | -     | -                                              | -                                 |

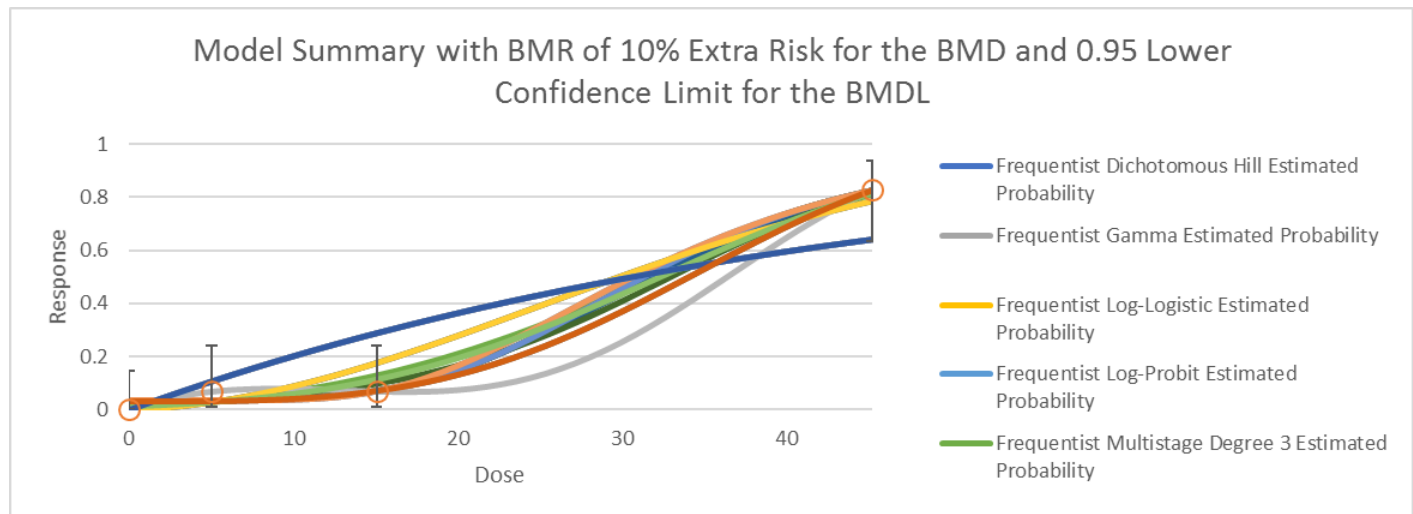

| Model Name       | Posterior Probability | BMD         | BMDL | BMDU | P-value | AIC    | Scaled residual for dose group nearest the BMD | Scaled residual for control group |
|------------------|-----------------------|-------------|------|------|---------|--------|------------------------------------------------|-----------------------------------|
| Dichotomous Hill | 0.01                  | 2.18        | 0.52 | 4.81 | 0.23    | 125.26 | -0.06                                          | -0.06                             |
| Gamma            | 0.03                  | 0.43        | 0.00 | 2.76 | 0.73    | 120.88 | -0.02                                          | -0.02                             |
| Logistic         | 0.01                  | 4.90        | 3.83 | 6.27 | 0.04    | 127.22 | -1.96                                          | -1.96                             |
| LogLogistic      | 0.00                  | 2.18        | 0.52 | 4.81 | 0.40    | 123.26 | -0.06                                          | -0.06                             |
| LogProbit        | 0.01                  | 2.16        | 0.51 | 4.85 | 0.50    | 122.35 | -0.05                                          | -0.05                             |
| Multistage-5     | 0.00                  | 1.66        | 1.34 | 2.50 | 0.84    | 119.95 | -0.21                                          | -0.21                             |
| Multistage-4     | 0.00                  | 1.72        | 1.36 | 2.56 | 0.74    | 120.40 | -0.25                                          | -0.25                             |
| Multistage-3     | 0.00                  | 1.82        | 1.39 | 2.77 | 0.54    | 121.33 | -0.30                                          | -0.30                             |
| Multistage-2     | 0.00                  | 1.98        | 1.46 | 3.21 | 0.34    | 122.51 | -0.32                                          | -0.32                             |
| Multistage-1     | 0.00                  | 2.16        | 1.66 | 2.93 | 0.43    | 120.78 | -0.43                                          | -0.43                             |
| Probit           | 0.01                  | 5.11        | 4.12 | 6.41 | 0.04    | 127.82 | 1.80                                           | -2.05                             |
| Quantal-Linear   | 0.92                  | 2.16        | 1.66 | 2.93 | 0.43    | 120.78 | -0.43                                          | -0.43                             |
| Weibull          | 0.02                  | 0.82        | 0.10 | 2.87 | 0.66    | 121.20 | -0.05                                          | -0.05                             |
| <b>BMA</b>       |                       | <b>2.38</b> | 1.66 | 3.45 | -       | -      | -                                              | -                                 |

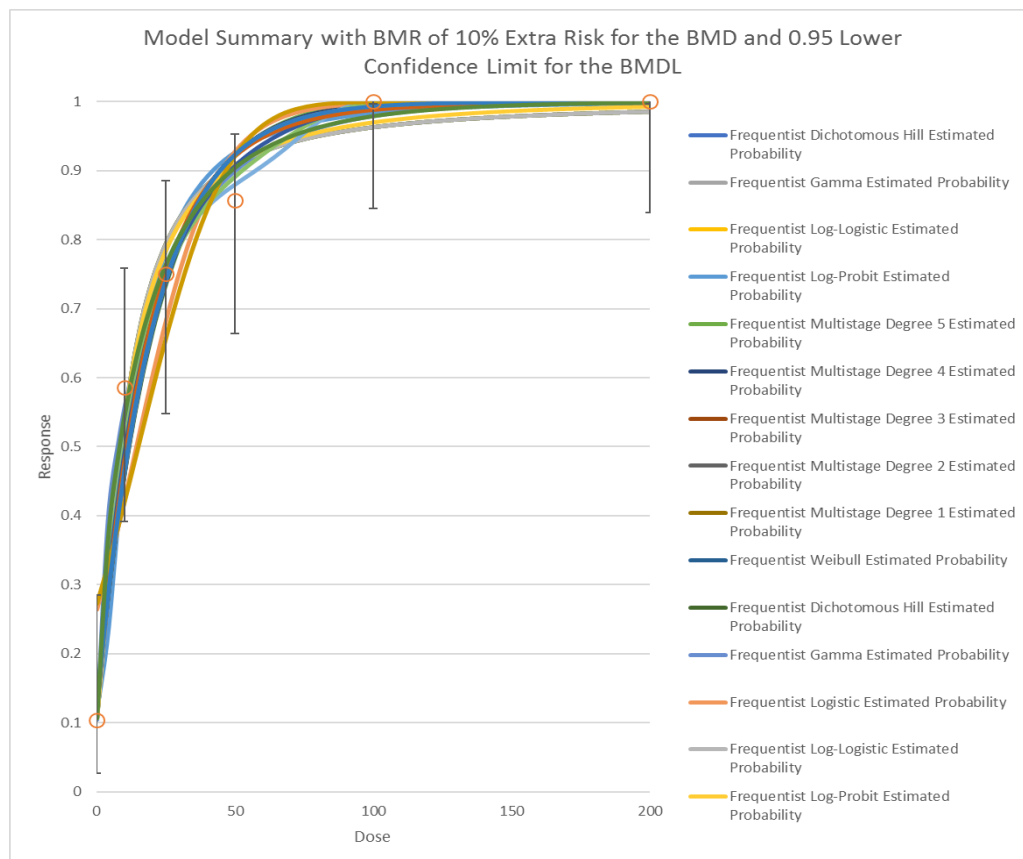

| Model Name       | Posterior Probability | BMD          | BMDL  | BMDU  | P-value | AIC    | Scaled residual for dose group nearest the BMD | Scaled residual for control group |
|------------------|-----------------------|--------------|-------|-------|---------|--------|------------------------------------------------|-----------------------------------|
| Dichotomous Hill | 0.07                  | 33.39        | 4.84  | 84.83 | NA      | 122.18 | -0.17                                          | 0.12                              |
| Gamma            | 0.07                  | 31.74        | 3.63  | 85.53 | 0.71    | 120.26 | -0.23                                          | 0.15                              |
| Logistic         | 0.12                  | 53.95        | 41.99 | 70.31 | 0.55    | 119.29 | -0.39                                          | -0.25                             |
| LogLogistic      | 0.13                  | 33.40        | 4.84  | 84.83 | 0.81    | 120.18 | -0.17                                          | 0.12                              |
| LogProbit        | 0.04                  | 34.73        | 5.46  | 86.07 | 0.91    | 120.13 | -0.07                                          | 0.06                              |
| Multistage-3     | 0.05                  | 46.24        | 14.27 | 83.25 | NA      | 122.12 | -0.01                                          | 0.01                              |
| Multistage-2     | 0.05                  | 27.17        | 11.27 | 85.84 | 0.69    | 120.28 | -0.31                                          | 0.22                              |
| Multistage-1     | 0.05                  | 27.62        | 19.07 | 44.49 | 0.92    | 118.28 | -0.30                                          | 0.21                              |
| Probit           | 0.13                  | 50.51        | 39.72 | 66.36 | 0.61    | 119.08 | -0.34                                          | -0.18                             |
| Quantal-Linear   | 0.31                  | 27.62        | 19.07 | 44.48 | 0.92    | 118.28 | -0.30                                          | 0.21                              |
| Weibull          | 0.08                  | 30.60        | 4.05  | 83.95 | 0.70    | 120.27 | -0.26                                          | 0.17                              |
| <b>BMA</b>       | -                     | <b>40.72</b> | 19.16 | 74.16 | -       | -      | -                                              | -                                 |

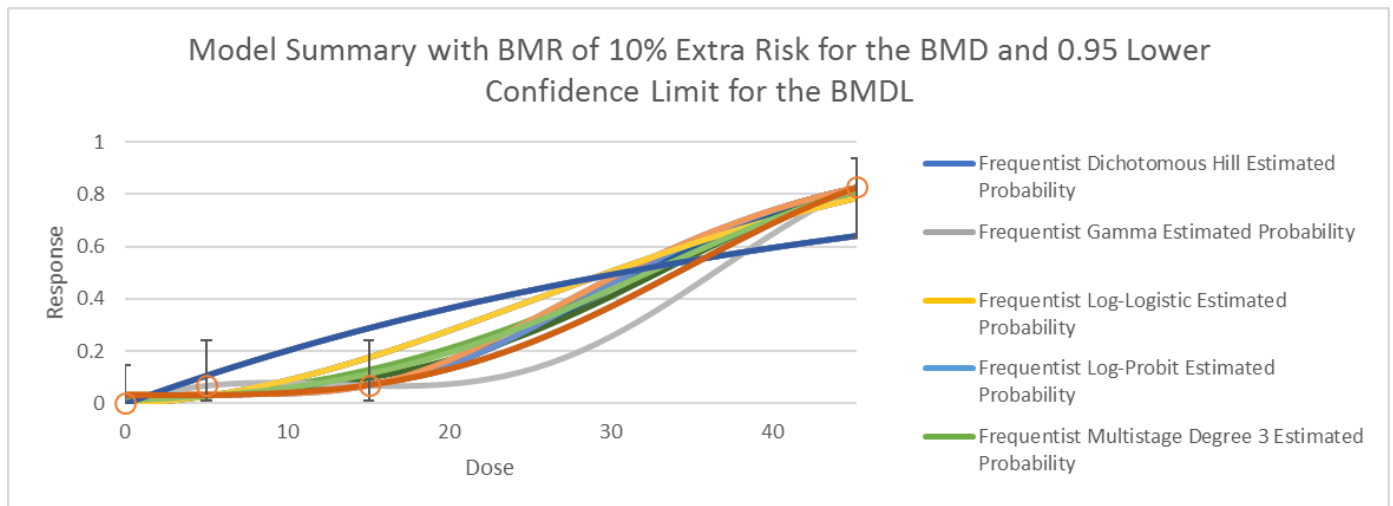

Supplement: s1 [file s1]
